# Supplementary material for: Conventional DCs reduce liver ischemia/reperfusion injury in mice via IL-10 secretion
Source: JCI journal article supplement (doi:10.1172/jci40008), 2010-01-21
Supplement: sd1 [file 1]

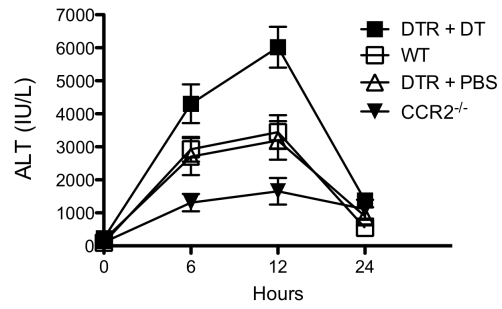

**Figure. S1. Time course of liver injury following liver I/R.** WT (B6), CCR2<sup>-/-</sup> and CD11c-DTR mice pre-treated with DT or PBS 12 h earlier underwent 1 h of ischemia and serum ALT was measured 0, 6, 12 or 24 h later. Data represent means  $\pm$  SEM. N = 5 mice per group.

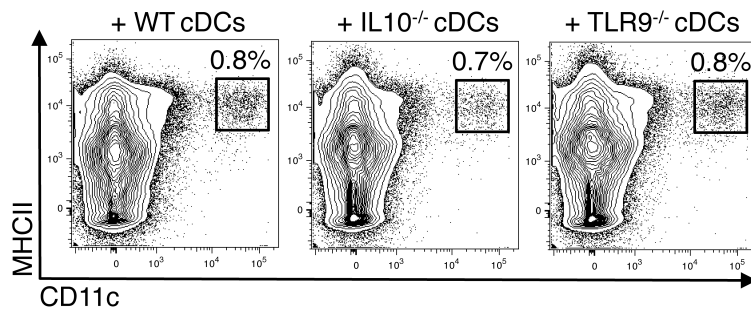

**Figure S2. Reconstitution of adoptively transferred cDCs.** CD11c-DTR mice pre-treated with DT were injected i.v. with  $1 \times 10^7$  WT, IL10<sup>-/-</sup>, or TLR9<sup>-/-</sup> cDCs just prior to I/R. Ischemic liver CD45<sup>+</sup> NPCs were isolated 12 h later and assessed for the presence of injected cDCs. Data are representative of 2 independent experiments, n = 4-6 mice per group.

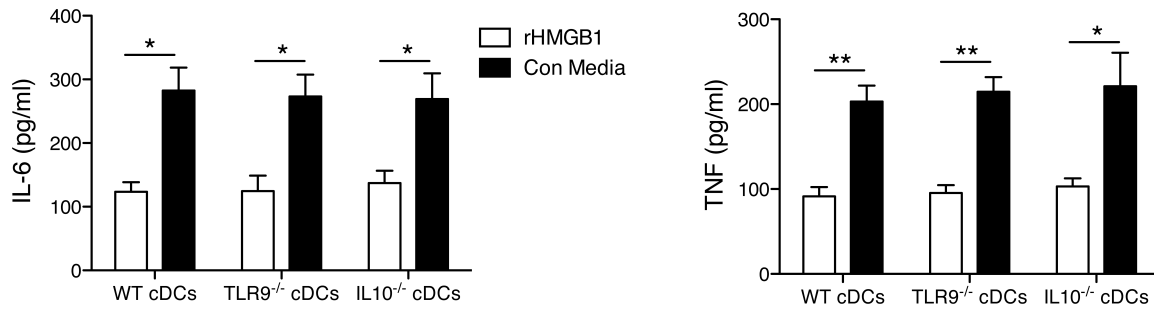

**Figure S3. cDC cytokine production.** WT, TLR9<sup>-/-</sup> and IL10<sup>-/-</sup> cDCs were purified by immunomagnetic beading and cultured with recombinant HMGB1 (rHMGB1, 20 µg/ml) or conditioned (Con) media. Supernatant levels of IL-6 and TNF were determined 18 h later using a cytometric bead array. Data represent means ± SEM and are representative of 2 independent experiments, n = 5 mice per group. \*, p < 0.05; \*\*, p < 0.01.

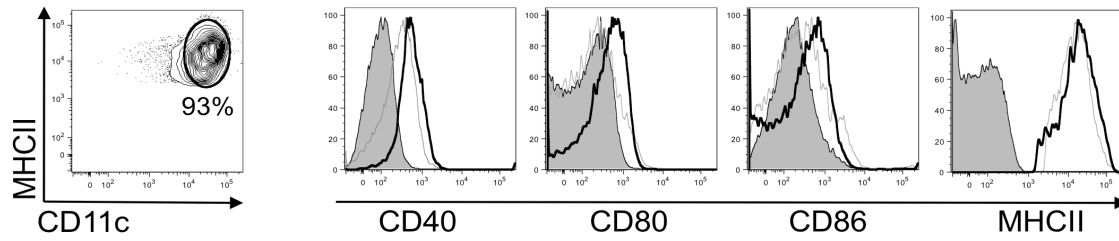

**Figure S4. cDC purity and maturation.** Spleen cDCs used for adoptive transfer experiments were isolated from Flt3L-treated WT mice as described in Materials and Methods. The purity (CD11c<sup>hi</sup>MHCII<sup>hi</sup>) and maturation (CD40, 80, 86 and MHCII) of freshly isolated cDCs was determined by FACS. Isotype (shaded histograms), spleen cDCs from untreated WT mice (gray histograms) and cDCs from Flt3L-treated mice (bold histograms). Data are representative of at least 2 independent experiments each with 5 mice.
